# Supplementary material for: Optimization of a minimal synergistic enzyme system for hydrolysis of raw cassava pulp
Source: Royal Society of Chemistry journal article supplement (doi:10.1039/c7ra08472b), 2017-01-01
Supplement: c7ra08472b1.pdf [file c7ra08472b1.pdf]

## 1 Supplementary data

2 GAACTTGCATTTTCCACCCTTTTTATCCTTCACCTTGGGCTAACGGACAGGGAGAGTGGGCAGAGGCATACCAG  
3 AGAGCAGTCGCTATTGTTTCTCAAATGACTTTGGATGAAAAGGTCAATCTTACTACCGGAACCGGTTGGGAATTG  
4 GAGAAATGTGTTGGTCAAACAGGTGGAGTCCCAAGATTGAACATGGTGGAATGTGCTTGCAGGACTCTCCTCTT  
5 GGAATCAGAGATTCTGACTACAACCTCCGATTTCCAGCTGGTGTAAATGTCGCTGCCACCTGGGATAAGAACTTG  
6 GCCTATCTTAGAGGACAAGCAATGGGTCAGGAATTTTCTGATAAGGGAATCGACGTTCAATTGGGTCAGCAGCT  
7 GGACCTCTTGGTAGATCACCTGACGGTGAAGAAATGGGAAGGTTTTTCTCCAGATCCTGCCTTGACAGGTGTT  
8 CTTTTCGCAGAGACTATTAAGGGAATCCAGGATGCTGGTGTGTGCTACTGCCAAACATTACATTTTGAACGAA  
9 CAAGAGCACTTTAGACAGGTTGCTGAAGCCGAGGATATGGTTTCAATATTTCTGACACTATCTCTTCCAACGTT  
10 GATGACAAGACCATCCATGAGATGTACTTGTGGCCATTTGCAGATGCTGTCAGAGCTGGAGTTGGTGCCATCATG  
11 TGTTCTTACAACCAAAATCAACAACCTCTTACGGTTGCCAGAACTCTACACTTTGAATAAGTTGCTTAAGGCCGAA  
12 TTGGGATTTCAAGGTTTCGTTATGTCCGACTGGGGTGTCTACTCAGGAGTTGGTAGTGCCTTGGCAGGACTT  
13 GATATGTCAATGCCTGGAGATATTACTTTTACTCTGCAACCTCCTTCTGGGGAATAACTTGACCATCGCTGTC  
14 CTTAATGGTACTGTTCCACAATGGAGAGTCGATGACATGGCTGTTAGAATTATGGCTGCCTACTATAAAGTTGGT  
15 AGAGACAGATTGTACCAGCCACCTAACTTTTTCAAGTTGGACCAGAGATGAATACGGTTTTTAAGTACTTCTATCCA  
16 CAAGAAGGTCCTTACGAGAAGGTTAACCATTTTCGTTAACGTCCAGAGAAATCACTCTGAGGTTATTAGAAAGTTG  
17 GGAGCCGACTCCACTGTCTTGTCTAAAAACAATAACGCATTGCCACTTACCGGTAAGAAAGAAAAGTTGCTATC  
18 TTGGGAGAGGATGCCGGTTCTAACTCCTATGGAGCTAATGGTTGTTTCAGATAGAGGATGCGACAATGGTACTTTG  
19 GCTATGGCCTGGGGAAGTGGTACTGCTGAATTTCCATACTTGGTTACACCTGAACAAGCCATTCAGGCAGAGGTT  
20 TTGAAGCACAAAGGTTCTGTCTATGCAATCACCGACAACCTGGGCTTTGTCCCAAGTTGAGACACTTGCTAAGCAG  
21 GCCTCAGTCAGTTTGGTTTTTCGTCATTTCTGATGCTGGAGAAGGTTACATTTCCGTTGATGGAAACGAGGGTGAC  
22 AGAAATAACTTGACCCTTTGAAGAATGGAGATAACTTGATCAAAGCAGCTGCCAACAACTGTAACAACACAATC  
23 GTTGTATCCATTCGTTGGTCCAGTTTTGGTGCATGAATGGTACGACCACCCTAATGTTACTGCAATTTTGTGG  
24 GCTGGACTTCTGGTCAAGAGTCAGGTAATAGTTTGGCCGACGTCCTTTATGGAAGAGTTAACCCAGGTGCTAAG  
25 TCACCTTTTACATGGGGAAAAACTAGAGAAGCTTACGGAGATTATTTGGTTAGAGAGCTTAATAACGGAAACGGT  
26 GCTCCTCAAGATGACTTTTCCGAAGGAGTTTTTCATTGATTACAGAGGTTTCGACAAGAGAAACGAAACACCAATC  
27 TATGAGTTTGGACATGGTTTTGTCTATACACAACCTTCAACTATAGTGGTTTGACATTCAGTTCTTAACGCTTCT  
28 TCCAATGCACAGGTCGCTACCGAAACAGGTGCAGCTCCAACCTTTGGACAAGTTGGTAATGCTTCTGACTACGTC  
29 TATCCAGAGGGTTTGACAAGAATTTCAAAGTTTCACTACCTTGGTTGAACAGTACTGATCTTAAAGCTTCAAGT  
30 GGAGACCATACTATGGTGTGATAACAGCTGAACATGTCCCTGAGGGAGCCACTGATGGTTACCACAACCTGTT  
31 TTGCCAGCTGGTGGAGGTAGTGGAGGTAATCCTAGATTGTACGACGAACTTATTAGAGTTTCTGTCACCGTTAAG  
32 AACACAGGAAGAGTCGCCGAGATGCAGTTCTCAGTTGTATGTCTCCCTTGGAGGTCCAAATGAGCCTAAGGTT  
33 GTCTTGAGAAAGTTGATAGATTGACCCTTAAGCCTCTGAAGAGACAGTTTGGACCACAACCTTGGACTAGAAGA  
34 GATCTTTCTAACTGGGACGTTGCCGCACAAGATTGGGTCATTACTTCTATCCAAAGAAAGTCCACGTCGGTAGT  
35 TCATCAAGACAGTTGCCACTTACGCGCACTTCTTAAGGTCCAA

36

37 **Fig S1:** Nucleotide sequence of  $\beta$ -glucosidase gene (BGL) from *A. aculeatus* with codon  
38 optimization for expression in *P. pastoris*.

39

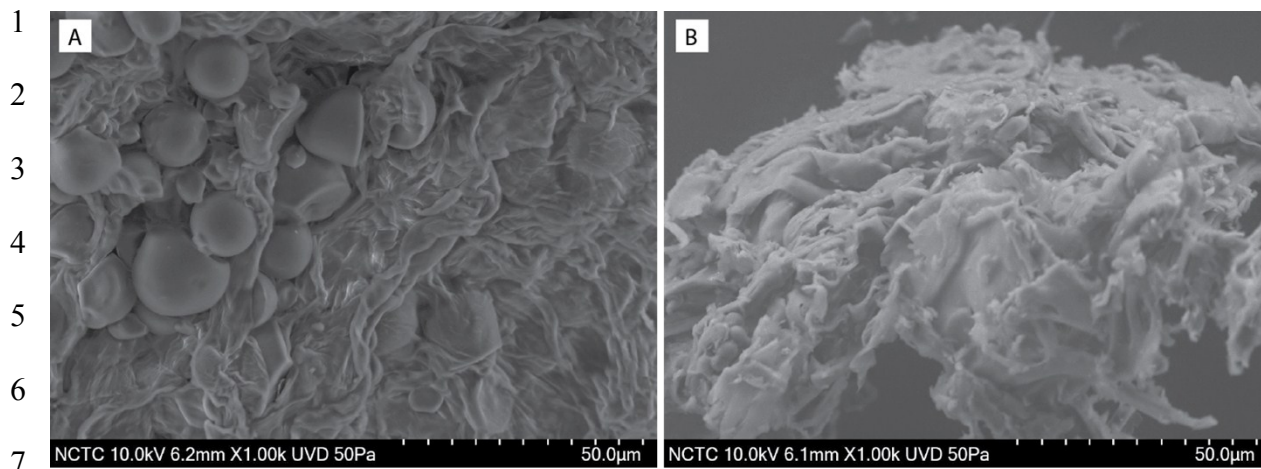

8

9 **Figure S2:** Scanning electron micrographs of (A) native cassava pulp and (B) de-starched  
10 cassava pulp.

11

12

13

14

15

16

17

18

19

20

21

22

23

1

(A)

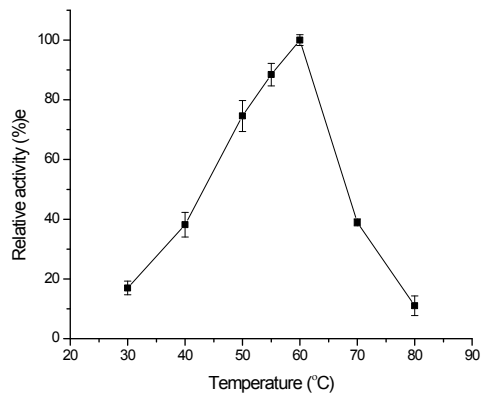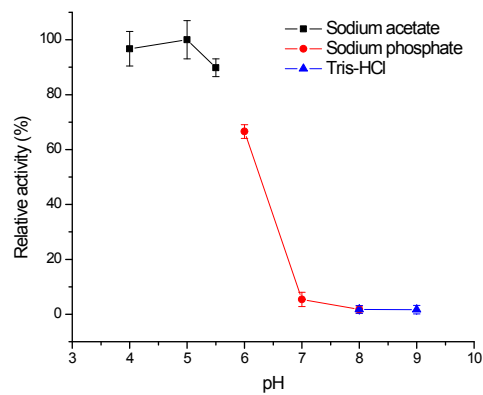

6

7

(B)

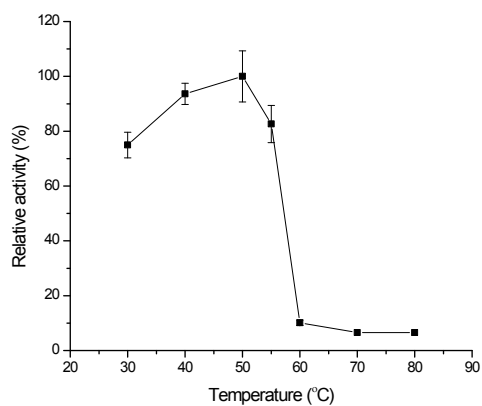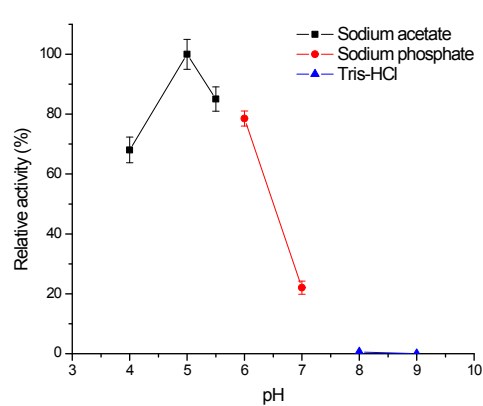

12

13

(C)

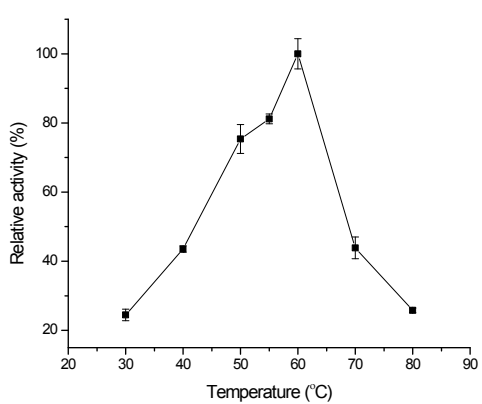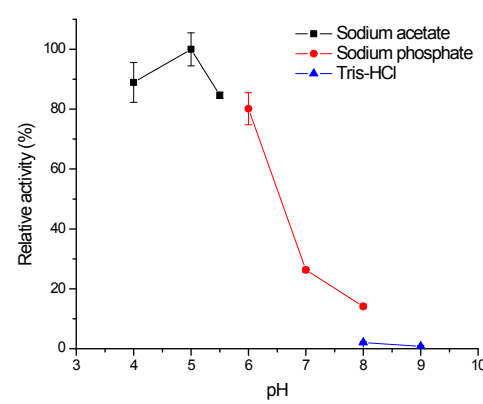

18

19

(D)

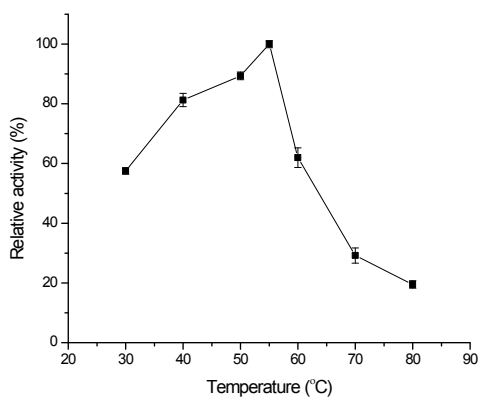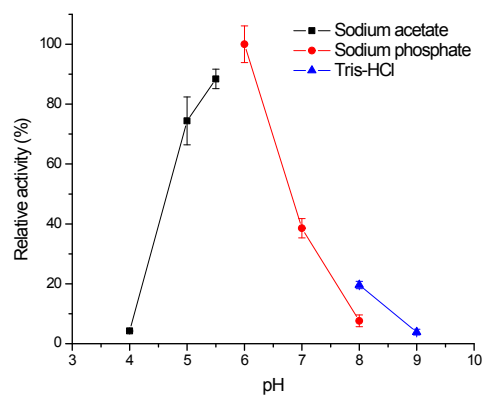

23

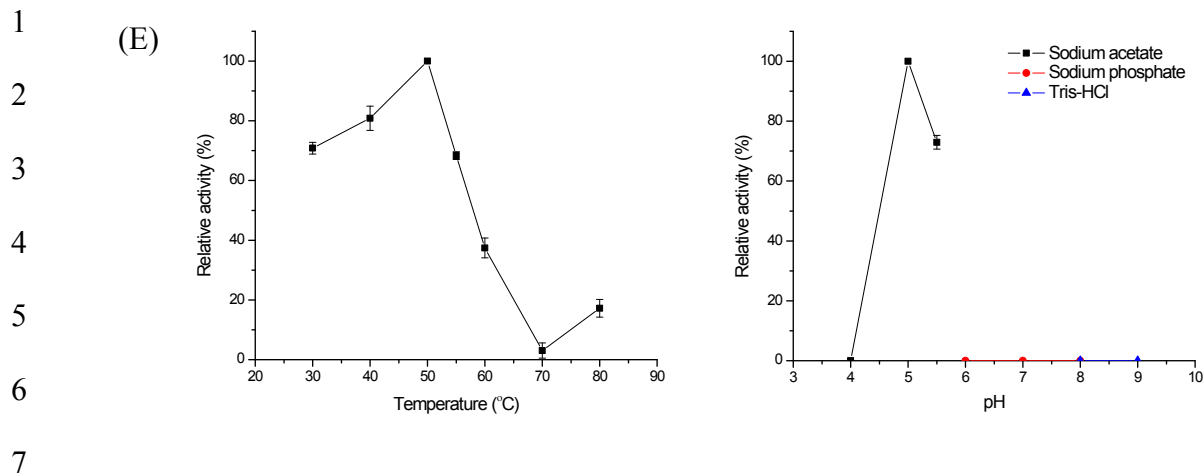

8 **Figure S3:** Effects of temperature and pH on activity of the recombinant enzymes. The enzyme  
9 activity was measured in 100 mM sodium acetate buffer, pH 5.0 for optimal temperature study  
10 and in 100 mM sodium acetate (pH 4.0-5.5), 100 mM sodium phosphate (pH 6.0-8.0), or 100  
11 mM Tris-HCl (pH 8.0-9.0) at the optimal temperature of the respective enzyme for optimal pH  
12 study. (A) cellobiohydrolase (Cel7A) from *T. cellulyticus*, (B) endo-glucanase (Cel12) from *A.*  
13 *aculeatus* BCC17849, (C)  $\beta$ -glucosidase (BGL) from *A. aculeatus*, (D) endo- $\beta$ 1,4-xylanase  
14 (XYN) from *A. aculeatus* BCC17849 and (E) endopolygalacturonase (EPG) from *A. aculeatus*  
15 BCC17849.

16

17

18

19

20

21

22

23

1 **Table S1:** Kinetic parameters of the enzymes

| Enzyme | Source                       | Substrate             | $V_{max}$                                         | $K_m$       |
|--------|------------------------------|-----------------------|---------------------------------------------------|-------------|
| Cel12  | <i>A. aculeatus</i> BCC17849 | CMC                   | 15.20 $\mu\text{mole}/\text{min mg protein}$      | 11.67 mg/ml |
|        |                              | Beechwood xylan       | 10.44 $\mu\text{mole}/\text{min mg protein}$      | 10.20 mg/ml |
| Cel7A  | <i>T. cellulolyticus</i>     | Avicel                | 0.08 $\mu\text{mole}/\text{min mg protein}$       | 18.36 mg/ml |
|        |                              | Beechwood xylan       | 0.11 $\mu\text{mole}/\text{min mg protein}$       | 6.84 mg/ml  |
| BGL    | <i>A. aculeatus</i>          | PNP-glucopyranoside   | 0.53 $\mu\text{mole}/\text{min mg protein}$       | 0.64 mM     |
| XYN    | <i>A. aculeatus</i> BCC17849 | Beechwood xylan       | 421.02 $\mu\text{mole}/\text{min mg protein}$     | 6.64 mg/ml  |
|        |                              | CMC                   | 0.28 $\mu\text{mole}/\text{min mg protein}$       | 11.34 mg/ml |
| EPG    | <i>A. aculeatus</i> BCC17849 | Polygalacturonic acid | 259,871.23 $\mu\text{mole}/\text{min mg protein}$ | 0.84 mg/ml  |

2 <sup>a</sup> Activity determined at 50°C, pH 5.0.

3  
4  
5  
6  
7  
8  
9  
10  
11  
12  
13  
14  
15  
16  
17  
18  
19  
20

1 **Table S2:** Enzyme activity profiles on different substrates

| Enzyme | Source                       | Activity (U/mg) on the respective substrate <sup>a</sup> |                 |                    |                         |                          |                   | References |
|--------|------------------------------|----------------------------------------------------------|-----------------|--------------------|-------------------------|--------------------------|-------------------|------------|
|        |                              | CMC                                                      | Avicel          | Beechwood<br>xylan | PNP-gluco<br>pyranoside | Polygalacturonic<br>acid | Cassava<br>starch |            |
| Cel12  | <i>A. aculeatus</i> BCC17849 | 9.31                                                     | ND <sup>b</sup> | 2.75               | ND                      | ND                       | ND                | This study |
| Cel7A  | <i>T. cellulolyticus</i>     | ND                                                       | 0.075           | 0.05               | ND                      | ND                       | ND                | 21         |
| BGL    | <i>A. aculeatus</i>          | ND                                                       | ND              | ND                 | 0.33                    | ND                       | ND                | Submitted  |
| XYN    | <i>A. aculeatus</i> BCC17849 | 0.15                                                     | ND              | 389.80             | ND                      | ND                       | ND                | 13         |
| EPG    | <i>A. aculeatus</i> BCC17849 | ND                                                       | ND              | ND                 | ND                      | 169,089.79               | ND                | This study |

2 <sup>a</sup> Activity determined at 50°C, pH 5.0.3 <sup>b</sup> ND: not detectable

4
